# Supplementary material
Source: publisher figshare collection journal article supplement (https://frontiersin.figshare.com/ndownloader/files/24161633)
Supplement: Supplementary file [file 24161633]

## SUPPLEMENTAL MATERIAL

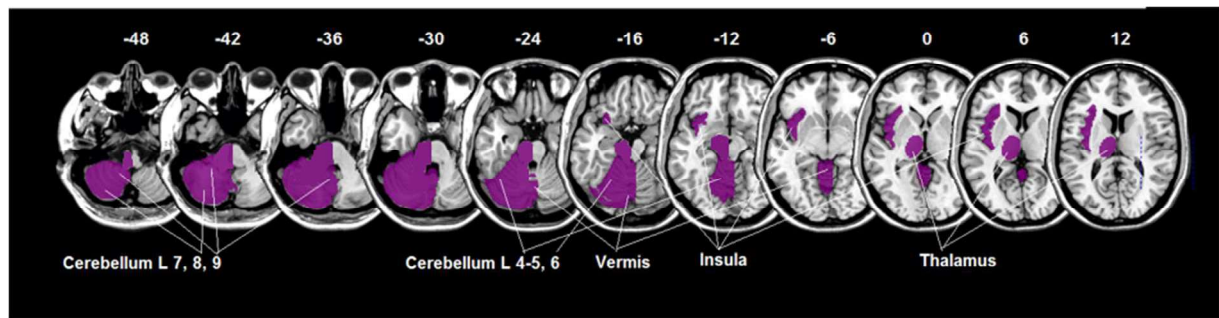

**Online Supplement 1: Brain areas included in the custom-made mask.** The mask includes all relevant hubs of the central vestibular and ocular motor networks.
